# Supplementary material for: Avoiding bias in Mendelian randomization when stratifying on a collider
Source: bioRxiv or medRxiv preprint supplement (doi:10.1101/2021.08.17.21262178), 2021-08-24
Supplement: Supplementary file [file media-1.pdf]

## Supplementary Tables

|                                                                                                                                                                                                                                                                                          |    |
|------------------------------------------------------------------------------------------------------------------------------------------------------------------------------------------------------------------------------------------------------------------------------------------|----|
| <b>Supplementary Table 1.</b> Scenario A1, results for positive, negative, and mixed confounding, adjustment approach, $\alpha_1=0.3$ .....                                                                                                                                              | 2  |
| <b>Supplementary Table 2.</b> Scenario A1, results for positive, negative, and mixed confounding, adjustment approach, $\alpha_1=0.05$ .....                                                                                                                                             | 3  |
| <b>Supplementary Table 3.</b> Scenario A2, results for negative, and mixed confounding, stratification approach, $\alpha_1=0.1$ .....                                                                                                                                                    | 4  |
| <b>Supplementary Table 4.</b> Scenario A2, results for positive, negative, and mixed confounding, stratification approach, $\alpha_1=0.3$ .....                                                                                                                                          | 5  |
| <b>Supplementary Table 5.</b> Scenario A2, results for positive, negative, and mixed confounding, stratification approach, $\alpha_1=0.05$ .....                                                                                                                                         | 6  |
| <b>Supplementary Table 6.</b> Scenario A2, results for positive confounding, stratification approach, when $\alpha_1=0.5$ and $n=50,000$ , respectively.....                                                                                                                             | 7  |
| <b>Supplementary Table 7.</b> Scenario A3, results for negative, and mixed confounding, stratification approach, $\alpha_1=0.1$ .....                                                                                                                                                    | 8  |
| <b>Supplementary Table 8.</b> Scenario A3, results for positive, negative, and mixed confounding, stratification approach, $\alpha_1=0.3$ .....                                                                                                                                          | 9  |
| <b>Supplementary Table 9.</b> Scenario A3, results for positive, negative, and mixed confounding, stratification approach, $\alpha_1=0.05$ .....                                                                                                                                         | 10 |
| <b>Supplementary Table 10.</b> Scenario B1, results for positive confounding, adjustment approach, $\alpha_1=0.1$ , considering C as a function of both risk factor and outcome.....                                                                                                     | 11 |
| <b>Supplementary Table 11.</b> Scenario B2 and B3, results for positive confounding, stratification approach, $\alpha_1=0.1$ , considering C as a function of both risk factor and outcome, when the causal effect is constant (Scenario B2) and it when depends on U (Scenario B3)..... | 12 |
| <b>Supplementary Table 12.</b> Scenario C1, results for positive confounding, adjustment approach, $\alpha_1=0.1$ , considering a binary outcome Y.....                                                                                                                                  | 13 |
| <b>Supplementary Table 13.</b> Scenario C2 and C3, results for positive confounding, stratification approach, $\alpha_1=0.1$ , considering a binary outcome Y, when the causal effect is constant (Scenario C2) and it when depends on C (Scenario C3).....                              | 14 |

Supplementary Table 1. Scenario A1, results for positive, negative, and mixed confounding, adjustment approach,  $\alpha_1=0.3$

|         |         | Positive confounding ( $\alpha_2$ and $\beta_2 = 0.8$ ) |                       | Negative confounding ( $\alpha_2$ and $\beta_2 = -0.8$ ) |                       | Mixed confounding ( $\alpha_2 = 0.8$ and $\beta_2 = -0.8$ ) |                       |
|---------|---------|---------------------------------------------------------|-----------------------|----------------------------------------------------------|-----------------------|-------------------------------------------------------------|-----------------------|
|         |         | Median of causal estimates                              | Type I error rate (%) | Median of causal estimates                               | Type I error rate (%) | Median of causal estimates                                  | Type I error rate (%) |
| $\mu_1$ | $\mu_2$ | <i>No adjust for collider</i>                           |                       |                                                          |                       |                                                             |                       |
| -0.5    | -0.5    | 0.00                                                    | 6%                    | 0.00                                                     | 5%                    | 0.00                                                        | 6%                    |
|         | 0       | 0.01                                                    | 4%                    | 0.00                                                     | 6%                    | 0.00                                                        | 2%                    |
|         | 0.5     | 0.00                                                    | 5%                    | 0.00                                                     | 4%                    | 0.00                                                        | 5%                    |
| 0       | -0.5    | 0.00                                                    | 4%                    | 0.00                                                     | 4%                    | 0.00                                                        | 4%                    |
|         | 0       | 0.00                                                    | 5%                    | 0.00                                                     | 5%                    | 0.00                                                        | 6%                    |
|         | 0.5     | 0.00                                                    | 4%                    | 0.00                                                     | 5%                    | 0.00                                                        | 5%                    |
| 0.5     | -0.5    | 0.00                                                    | 4%                    | 0.00                                                     | 5%                    | 0.00                                                        | 5%                    |
|         | 0       | 0.00                                                    | 7%                    | 0.00                                                     | 4%                    | 0.00                                                        | 4%                    |
|         | 0.5     | 0.00                                                    | 6%                    | 0.00                                                     | 6%                    | 0.00                                                        | 4%                    |
| $\mu_1$ | $\mu_2$ | <i>Adjust Y/G for collider</i>                          |                       |                                                          |                       |                                                             |                       |
| -0.5    | -0.5    | -0.17                                                   | 100%                  | 0.04                                                     | 13%                   | 0.18                                                        | 100%                  |
|         | 0       | -0.12                                                   | 81%                   | -0.12                                                    | 77%                   | 0.11                                                        | 76%                   |
|         | 0.5     | 0.03                                                    | 11%                   | -0.18                                                    | 100%                  | -0.03                                                       | 10%                   |
| 0       | -0.5    | 0.00                                                    | 6%                    | 0.00                                                     | 5%                    | 0.00                                                        | 6%                    |
|         | 0       | 0.00                                                    | 4%                    | 0.00                                                     | 5%                    | 0.00                                                        | 5%                    |
|         | 0.5     | 0.00                                                    | 4%                    | 0.00                                                     | 4%                    | 0.00                                                        | 6%                    |
| 0.5     | -0.5    | 0.04                                                    | 13%                   | -0.18                                                    | 99%                   | -0.03                                                       | 12%                   |
|         | 0       | -0.11                                                   | 75%                   | -0.11                                                    | 76%                   | 0.11                                                        | 77%                   |
|         | 0.5     | -0.17                                                   | 99%                   | 0.03                                                     | 9%                    | 0.18                                                        | 100%                  |

- Empirical Type I error rate represents the proportion of simulated datasets where the null hypothesis is not rejected

Supplementary Table 2. Scenario A1, results for positive, negative, and mixed confounding, adjustment approach,  $\alpha_1=0.05$

|         |         | Positive confounding ( $\alpha_2$ and $\beta_2 = 0.8$ ) |                       | Negative confounding ( $\alpha_2$ and $\beta_2 = -0.8$ ) |                       | Mixed confounding ( $\alpha_2 = 0.8$ and $\beta_2 = -0.8$ ) |                       |
|---------|---------|---------------------------------------------------------|-----------------------|----------------------------------------------------------|-----------------------|-------------------------------------------------------------|-----------------------|
|         |         | Median of causal estimates                              | Type I error rate (%) | Median of causal estimates                               | Type I error rate (%) | Median of causal estimates                                  | Type I error rate (%) |
| $\mu_1$ | $\mu_2$ | <i>No adjust for collider</i>                           |                       |                                                          |                       |                                                             |                       |
| -0.5    | -0.5    | -0.02                                                   | 3%                    | 0.00                                                     | 7%                    | -0.03                                                       | 5%                    |
|         | 0       | -0.01                                                   | 5%                    | 0.01                                                     | 5%                    | -0.01                                                       | 4%                    |
|         | 0.5     | -0.01                                                   | 5%                    | 0.00                                                     | 5%                    | 0.03                                                        | 5%                    |
| 0       | -0.5    | 0.05                                                    | 5%                    | 0.00                                                     | 3%                    | 0.00                                                        | 6%                    |
|         | 0       | -0.01                                                   | 4%                    | -0.01                                                    | 5%                    | -0.02                                                       | 5%                    |
|         | 0.5     | 0.02                                                    | 5%                    | 0.00                                                     | 5%                    | -0.04                                                       | 6%                    |
| 0.5     | -0.5    | 0.00                                                    | 7%                    | 0.00                                                     | 5%                    | 0.00                                                        | 5%                    |
|         | 0       | -0.01                                                   | 4%                    | -0.01                                                    | 5%                    | -0.01                                                       | 4%                    |
|         | 0.5     | -0.01                                                   | 5%                    | 0.03                                                     | 3%                    | 0.00                                                        | 4%                    |
| $\mu_1$ | $\mu_2$ | <i>Adjust Y/G for collider</i>                          |                       |                                                          |                       |                                                             |                       |
| -0.5    | -0.5    | -0.18                                                   | 11%                   | 0.04                                                     | 5%                    | 0.16                                                        | 13%                   |
|         | 0       | -0.13                                                   | 8%                    | -0.11                                                    | 6%                    | 0.13                                                        | 7%                    |
|         | 0.5     | 0.02                                                    | 5%                    | -0.18                                                    | 13%                   | -0.05                                                       | 6%                    |
| 0       | -0.5    | -0.01                                                   | 4%                    | -0.02                                                    | 6%                    | -0.02                                                       | 5%                    |
|         | 0       | 0.02                                                    | 5%                    | 0.00                                                     | 5%                    | -0.04                                                       | 6%                    |
|         | 0.5     | 0.00                                                    | 6%                    | 0.01                                                     | 7%                    | -0.01                                                       | 5%                    |
| 0.5     | -0.5    | 0.02                                                    | 5%                    | -0.19                                                    | 13%                   | -0.04                                                       | 4%                    |
|         | 0       | -0.12                                                   | 7%                    | -0.08                                                    | 6%                    | 0.11                                                        | 8%                    |
|         | 0.5     | -0.16                                                   | 9%                    | 0.03                                                     | 5%                    | 0.17                                                        | 12%                   |

Empirical Type I error rate represents the proportion of simulated datasets where the null hypothesis is not rejected

**Supplementary Table 3.** Scenario A2, results for negative, and mixed confounding, stratification approach,  $\alpha_1=0.1$

|         |         | Negative confounding ( $\alpha_2$ and $\beta_2 = -0.8$ )    |                     |                     |                     |                     |                                                  |                     |                     |                     |                     |
|---------|---------|-------------------------------------------------------------|---------------------|---------------------|---------------------|---------------------|--------------------------------------------------|---------------------|---------------------|---------------------|---------------------|
|         |         | Stratifying on collider, C                                  |                     |                     |                     |                     | Stratifying on residual collider, C <sub>0</sub> |                     |                     |                     |                     |
| $\mu_1$ | $\mu_2$ | Proportion homogeneity rejected (%)                         | Median estimates Q1 | Median estimates Q2 | Median estimates Q3 | Median estimates Q4 | Proportion homogeneity rejected (%)              | Median estimates Q1 | Median estimates Q2 | Median estimates Q3 | Median estimates Q4 |
| -0.5    | -0.5    | 6%                                                          | 0.44                | 0.45                | 0.46                | 0.45                | 3%                                               | 0.48                | 0.48                | 0.51                | 0.52                |
|         | 0       | 4%                                                          | 0.28                | 0.25                | 0.24                | 0.32                | 5%                                               | 0.49                | 0.49                | 0.49                | 0.5                 |
|         | 0.5     | 6%                                                          | 0.26                | 0.17                | 0.19                | 0.22                | 6%                                               | 0.52                | 0.49                | 0.5                 | 0.46                |
| 0       | -0.5    | 4%                                                          | 0.51                | 0.51                | 0.50                | 0.49                | 4%                                               | 0.52                | 0.51                | 0.49                | 0.49                |
|         | 0       | 7%                                                          | 0.49                | 0.50                | 0.50                | 0.49                | 5%                                               | 0.5                 | 0.49                | 0.5                 | 0.49                |
|         | 0.5     | 4%                                                          | 0.47                | 0.50                | 0.49                | 0.48                | 5%                                               | 0.47                | 0.49                | 0.5                 | 0.48                |
| 0.5     | -0.5    | 7%                                                          | 0.23                | 0.18                | 0.18                | 0.24                | 7%                                               | 0.47                | 0.48                | 0.51                | 0.49                |
|         | 0       | 4%                                                          | 0.28                | 0.27                | 0.25                | 0.32                | 5%                                               | 0.47                | 0.5                 | 0.5                 | 0.51                |
|         | 0.5     | 6%                                                          | 0.46                | 0.44                | 0.46                | 0.47                | 6%                                               | 0.48                | 0.5                 | 0.49                | 0.53                |
|         |         | Mixed confounding ( $\alpha_2 = 0.8$ and $\beta_2 = -0.8$ ) |                     |                     |                     |                     |                                                  |                     |                     |                     |                     |
| -0.5    | -0.5    | 6%                                                          | 0.54                | 0.53                | 0.52                | 0.52                | 5%                                               | 0.52                | 0.51                | 0.49                | 0.49                |
|         | 0       | 6%                                                          | 0.47                | 0.45                | 0.47                | 0.47                | 5%                                               | 0.51                | 0.48                | 0.48                | 0.50                |
|         | 0.5     | 5%                                                          | 0.43                | 0.39                | 0.38                | 0.39                | 5%                                               | 0.51                | 0.51                | 0.48                | 0.49                |
| 0       | -0.5    | 7%                                                          | 0.47                | 0.50                | 0.50                | 0.50                | 7%                                               | 0.47                | 0.50                | 0.50                | 0.49                |
|         | 0       | 5%                                                          | 0.50                | 0.49                | 0.47                | 0.49                | 4%                                               | 0.49                | 0.49                | 0.48                | 0.48                |
|         | 0.5     | 5%                                                          | 0.50                | 0.52                | 0.51                | 0.50                | 5%                                               | 0.50                | 0.51                | 0.51                | 0.49                |
| 0.5     | -0.5    | 5%                                                          | 0.42                | 0.39                | 0.41                | 0.43                | 6%                                               | 0.51                | 0.51                | 0.50                | 0.54                |
|         | 0       | 5%                                                          | 0.46                | 0.46                | 0.48                | 0.47                | 5%                                               | 0.49                | 0.49                | 0.51                | 0.50                |
|         | 0.5     | 5%                                                          | 0.51                | 0.52                | 0.54                | 0.54                | 4%                                               | 0.48                | 0.50                | 0.51                | 0.51                |

Proportion homogeneity rejected represents the proportion of simulated datasets where the null hypothesis of homogeneity is rejected

Supplementary Table 4. Scenario A2, results for positive, negative, and mixed confounding, stratification approach,  $\alpha_1=0.3$

|         |         | Positive confounding ( $\alpha_2$ and $\beta_2 = 0.8$ )   |                     |                     |                     |                     |                                                  |                     |                     |                     |                     |
|---------|---------|-----------------------------------------------------------|---------------------|---------------------|---------------------|---------------------|--------------------------------------------------|---------------------|---------------------|---------------------|---------------------|
|         |         | Stratifying on collider, C                                |                     |                     |                     |                     | Stratifying on residual collider, C <sub>0</sub> |                     |                     |                     |                     |
| $\mu_1$ | $\mu_2$ | Proportion homogeneity rejected (%)                       | Median estimates Q1 | Median estimates Q2 | Median estimates Q3 | Median estimates Q4 | Proportion homogeneity rejected (%)              | Median estimates Q1 | Median estimates Q2 | Median estimates Q3 | Median estimates Q4 |
| -0.5    | -0.5    | 11%                                                       | 0.25                | 0.19                | 0.19                | 0.26                | 5%                                               | 0.50                | 0.49                | 0.50                | 0.50                |
|         | 0       | 7%                                                        | 0.31                | 0.25                | 0.25                | 0.30                | 7%                                               | 0.51                | 0.50                | 0.49                | 0.50                |
|         | 0.5     | 5%                                                        | 0.47                | 0.44                | 0.46                | 0.46                | 5%                                               | 0.50                | 0.50                | 0.50                | 0.50                |
| 0       | -0.5    | 4%                                                        | 0.51                | 0.50                | 0.50                | 0.50                | 5%                                               | 0.51                | 0.50                | 0.50                | 0.50                |
|         | 0       | 5%                                                        | 0.50                | 0.51                | 0.50                | 0.50                | 5%                                               | 0.50                | 0.51                | 0.50                | 0.50                |
|         | 0.5     | 6%                                                        | 0.51                | 0.49                | 0.50                | 0.50                | 6%                                               | 0.50                | 0.49                | 0.50                | 0.50                |
| 0.5     | -0.5    | 6%                                                        | 0.47                | 0.46                | 0.45                | 0.46                | 5%                                               | 0.51                | 0.51                | 0.50                | 0.50                |
|         | 0       | 8%                                                        | 0.30                | 0.25                | 0.25                | 0.30                | 6%                                               | 0.50                | 0.51                | 0.50                | 0.49                |
|         | 0.5     | 6%                                                        | 0.26                | 0.20                | 0.18                | 0.25                | 4%                                               | 0.50                | 0.50                | 0.49                | 0.50                |
|         |         | Negative confounding ( $\alpha_2$ and $\beta_2 = -0.8$ )  |                     |                     |                     |                     |                                                  |                     |                     |                     |                     |
| -0.5    | -0.5    | 6%                                                        | 0.46                | 0.45                | 0.46                | 0.46                | 5%                                               | 0.49                | 0.50                | 0.50                | 0.50                |
|         | 0       | 7%                                                        | 0.31                | 0.24                | 0.25                | 0.31                | 5%                                               | 0.50                | 0.50                | 0.50                | 0.50                |
|         | 0.5     | 8%                                                        | 0.25                | 0.19                | 0.18                | 0.25                | 6%                                               | 0.49                | 0.50                | 0.50                | 0.50                |
| 0       | -0.5    | 3%                                                        | 0.50                | 0.51                | 0.49                | 0.49                | 4%                                               | 0.50                | 0.50                | 0.49                | 0.50                |
|         | 0       | 4%                                                        | 0.50                | 0.51                | 0.49                | 0.50                | 4%                                               | 0.50                | 0.50                | 0.49                | 0.50                |
|         | 0.5     | 4%                                                        | 0.50                | 0.51                | 0.51                | 0.49                | 3%                                               | 0.50                | 0.51                | 0.51                | 0.49                |
| 0.5     | -0.5    | 8%                                                        | 0.26                | 0.19                | 0.19                | 0.24                | 6%                                               | 0.50                | 0.50                | 0.51                | 0.49                |
|         | 0       | 8%                                                        | 0.31                | 0.25                | 0.24                | 0.31                | 4%                                               | 0.50                | 0.51                | 0.49                | 0.49                |
|         | 0.5     | 3%                                                        | 0.46                | 0.45                | 0.45                | 0.46                | 5%                                               | 0.50                | 0.50                | 0.49                | 0.50                |
|         |         | Mixed confounding ( $\alpha_2=0.8$ and $\beta_2 = -0.8$ ) |                     |                     |                     |                     |                                                  |                     |                     |                     |                     |
| -0.5    | -0.5    | 4%                                                        | 0.52                | 0.53                | 0.53                | 0.52                | 4%                                               | 0.50                | 0.50                | 0.50                | 0.50                |
|         | 0       | 6%                                                        | 0.48                | 0.48                | 0.46                | 0.47                | 4%                                               | 0.51                | 0.51                | 0.51                | 0.49                |
|         | 0.5     | 4%                                                        | 0.41                | 0.39                | 0.39                | 0.42                | 3%                                               | 0.50                | 0.50                | 0.50                | 0.50                |
| 0       | -0.5    | 7%                                                        | 0.50                | 0.50                | 0.51                | 0.50                | 7%                                               | 0.50                | 0.51                | 0.51                | 0.50                |
|         | 0       | 5%                                                        | 0.50                | 0.50                | 0.50                | 0.50                | 5%                                               | 0.50                | 0.50                | 0.50                | 0.50                |
|         | 0.5     | 5%                                                        | 0.50                | 0.50                | 0.49                | 0.50                | 5%                                               | 0.49                | 0.50                | 0.49                | 0.50                |
| 0.5     | -0.5    | 5%                                                        | 0.41                | 0.39                | 0.39                | 0.41                | 5%                                               | 0.50                | 0.50                | 0.51                | 0.50                |
|         | 0       | 4%                                                        | 0.48                | 0.47                | 0.47                | 0.48                | 4%                                               | 0.50                | 0.50                | 0.50                | 0.50                |
|         | 0.5     | 6%                                                        | 0.52                | 0.54                | 0.52                | 0.52                | 6%                                               | 0.49                | 0.51                | 0.50                | 0.50                |

Proportion homogeneity rejected represents the proportion of simulated datasets where the null hypothesis of homogeneity is rejected

Supplementary Table 5. Scenario A2, results for positive, negative, and mixed confounding, stratification approach,  $\alpha_1=0.05$

|                                                                                        |         | Positive confounding ( $\alpha_2$ and $\beta_2 = 0.8$ ) |                     |                     |                     |                     |                                                  |                     |                     |                     |                     |
|----------------------------------------------------------------------------------------|---------|---------------------------------------------------------|---------------------|---------------------|---------------------|---------------------|--------------------------------------------------|---------------------|---------------------|---------------------|---------------------|
|                                                                                        |         | Stratifying on collider, C                              |                     |                     |                     |                     | Stratifying on residual collider, C <sub>0</sub> |                     |                     |                     |                     |
| $\mu_1$                                                                                | $\mu_2$ | Proportion homogeneity rejected (%)                     | Median estimates Q1 | Median estimates Q2 | Median estimates Q3 | Median estimates Q4 | Proportion homogeneity rejected (%)              | Median estimates Q1 | Median estimates Q2 | Median estimates Q3 | Median estimates Q4 |
| -0.5                                                                                   | -0.5    | 7%                                                      | 0.29                | 0.21                | 0.19                | 0.25                | 6%                                               | 0.53                | 0.51                | 0.48                | 0.50                |
|                                                                                        | 0       | 6%                                                      | 0.24                | 0.26                | 0.23                | 0.32                | 5%                                               | 0.45                | 0.50                | 0.48                | 0.51                |
|                                                                                        | 0.5     | 6%                                                      | 0.37                | 0.48                | 0.39                | 0.41                | 5%                                               | 0.45                | 0.56                | 0.46                | 0.47                |
| 0                                                                                      | -0.5    | 6%                                                      | 0.48                | 0.48                | 0.53                | 0.51                | 6%                                               | 0.49                | 0.51                | 0.49                | 0.52                |
|                                                                                        | 0       | 4%                                                      | 0.49                | 0.47                | 0.54                | 0.47                | 4%                                               | 0.49                | 0.49                | 0.55                | 0.47                |
|                                                                                        | 0.5     | 5%                                                      | 0.57                | 0.49                | 0.53                | 0.49                | 5%                                               | 0.55                | 0.51                | 0.58                | 0.48                |
| 0.5                                                                                    | -0.5    | 8%                                                      | 0.44                | 0.50                | 0.45                | 0.48                | 8%                                               | 0.50                | 0.53                | 0.47                | 0.54                |
|                                                                                        | 0       | 6%                                                      | 0.31                | 0.20                | 0.27                | 0.31                | 6%                                               | 0.52                | 0.44                | 0.54                | 0.53                |
|                                                                                        | 0.5     | 6%                                                      | 0.24                | 0.16                | 0.16                | 0.23                | 5%                                               | 0.49                | 0.51                | 0.50                | 0.48                |
| <b>Negative confounding (<math>\alpha_2</math> and <math>\beta_2 = -0.8</math>)</b>    |         |                                                         |                     |                     |                     |                     |                                                  |                     |                     |                     |                     |
| -0.5                                                                                   | -0.5    | 5%                                                      | 0.49                | 0.43                | 0.45                | 0.48                | 5%                                               | 0.50                | 0.45                | 0.47                | 0.48                |
|                                                                                        | 0       | 5%                                                      | 0.28                | 0.21                | 0.25                | 0.28                | 5%                                               | 0.46                | 0.50                | 0.53                | 0.47                |
|                                                                                        | 0.5     | 4%                                                      | 0.30                | 0.22                | 0.14                | 0.29                | 4%                                               | 0.54                | 0.52                | 0.49                | 0.56                |
| 0                                                                                      | -0.5    | 4%                                                      | 0.49                | 0.52                | 0.48                | 0.52                | 5%                                               | 0.49                | 0.55                | 0.47                | 0.54                |
|                                                                                        | 0       | 4%                                                      | 0.55                | 0.46                | 0.46                | 0.48                | 4%                                               | 0.53                | 0.48                | 0.49                | 0.46                |
|                                                                                        | 0.5     | 6%                                                      | 0.48                | 0.49                | 0.47                | 0.57                | 6%                                               | 0.47                | 0.50                | 0.49                | 0.58                |
| 0.5                                                                                    | -0.5    | 7%                                                      | 0.26                | 0.22                | 0.19                | 0.24                | 6%                                               | 0.51                | 0.48                | 0.52                | 0.49                |
|                                                                                        | 0       | 4%                                                      | 0.32                | 0.23                | 0.33                | 0.33                | 5%                                               | 0.52                | 0.51                | 0.59                | 0.52                |
|                                                                                        | 0.5     | 6%                                                      | 0.49                | 0.40                | 0.40                | 0.46                | 6%                                               | 0.52                | 0.50                | 0.45                | 0.47                |
| <b>Mixed confounding (<math>\alpha_2 = 0.8</math> and <math>\beta_2 = -0.8</math>)</b> |         |                                                         |                     |                     |                     |                     |                                                  |                     |                     |                     |                     |
| -0.5                                                                                   | -0.5    | 6%                                                      | 0.51                | 0.52                | 0.55                | 0.49                | 5%                                               | 0.48                | 0.49                | 0.51                | 0.49                |
|                                                                                        | 0       | 6%                                                      | 0.47                | 0.46                | 0.41                | 0.50                | 6%                                               | 0.50                | 0.51                | 0.46                | 0.52                |
|                                                                                        | 0.5     | 6%                                                      | 0.44                | 0.39                | 0.35                | 0.38                | 6%                                               | 0.54                | 0.51                | 0.51                | 0.46                |
| 0                                                                                      | -0.5    | 6%                                                      | 0.50                | 0.52                | 0.49                | 0.53                | 6%                                               | 0.52                | 0.50                | 0.50                | 0.53                |
|                                                                                        | 0       | 6%                                                      | 0.50                | 0.55                | 0.53                | 0.49                | 5%                                               | 0.48                | 0.55                | 0.53                | 0.50                |
|                                                                                        | 0.5     | 6%                                                      | 0.51                | 0.51                | 0.45                | 0.51                | 6%                                               | 0.53                | 0.50                | 0.47                | 0.54                |
| 0.5                                                                                    | -0.5    | 5%                                                      | 0.45                | 0.41                | 0.32                | 0.42                | 6%                                               | 0.53                | 0.53                | 0.43                | 0.50                |
|                                                                                        | 0       | 5%                                                      | 0.49                | 0.46                | 0.45                | 0.45                | 5%                                               | 0.51                | 0.52                | 0.46                | 0.46                |
|                                                                                        | 0.5     | 5%                                                      | 0.49                | 0.54                | 0.50                | 0.54                | 4%                                               | 0.49                | 0.48                | 0.49                | 0.52                |

Proportion homogeneity rejected represents the proportion of simulated datasets where the null hypothesis of homogeneity is rejected

Supplementary Table 6. Scenario A2, results for positive confounding, stratification approach, when  $\alpha_1=0.5$  and  $n=50,000$ , respectively

|         |         | Positive confounding ( $\alpha_2$ and $\beta_2 = 0.8$ ), $\alpha_1=0.5$ , $n =10,000$ |                     |                     |                     |                                                  |                                     |                     |                     |                     |                     |
|---------|---------|---------------------------------------------------------------------------------------|---------------------|---------------------|---------------------|--------------------------------------------------|-------------------------------------|---------------------|---------------------|---------------------|---------------------|
|         |         | Stratifying on collider, C                                                            |                     |                     |                     | Stratifying on residual collider, C <sub>0</sub> |                                     |                     |                     |                     |                     |
| $\mu_1$ | $\mu_2$ | Proportion homogeneity rejected (%)                                                   | Median estimates Q1 | Median estimates Q2 | Median estimates Q3 | Median estimates Q4                              | Proportion homogeneity rejected (%) | Median estimates Q1 | Median estimates Q2 | Median estimates Q3 | Median estimates Q4 |
| -0.5    | -0.5    | 16%                                                                                   | 0.26                | 0.19                | 0.19                | 0.26                                             | 6%                                  | 0.5                 | 0.5                 | 0.5                 | 0.5                 |
|         | 0       | 10%                                                                                   | 0.31                | 0.25                | 0.25                | 0.31                                             | 5%                                  | 0.5                 | 0.5                 | 0.5                 | 0.5                 |
|         | 0.5     | 5%                                                                                    | 0.46                | 0.45                | 0.45                | 0.46                                             | 4%                                  | 0.5                 | 0.5                 | 0.5                 | 0.5                 |
| 0       | -0.5    | 5%                                                                                    | 0.5                 | 0.5                 | 0.5                 | 0.5                                              | 5%                                  | 0.5                 | 0.5                 | 0.5                 | 0.5                 |
|         | 0       | 6%                                                                                    | 0.5                 | 0.5                 | 0.5                 | 0.5                                              | 5%                                  | 0.49                | 0.5                 | 0.5                 | 0.5                 |
|         | 0.5     | 4%                                                                                    | 0.5                 | 0.51                | 0.5                 | 0.5                                              | 6%                                  | 0.5                 | 0.51                | 0.5                 | 0.5                 |
| 0.5     | -0.5    | 4%                                                                                    | 0.46                | 0.45                | 0.45                | 0.46                                             | 4%                                  | 0.5                 | 0.5                 | 0.5                 | 0.5                 |
|         | 0       | 9%                                                                                    | 0.31                | 0.25                | 0.25                | 0.31                                             | 6%                                  | 0.5                 | 0.49                | 0.5                 | 0.5                 |
|         | 0.5     | 14%                                                                                   | 0.26                | 0.18                | 0.19                | 0.26                                             | 5%                                  | 0.5                 | 0.5                 | 0.5                 | 0.5                 |
|         |         | Positive confounding ( $\alpha_2$ and $\beta_2 = 0.8$ ), $\alpha_1=0.1$ , $n =50,000$ |                     |                     |                     |                                                  |                                     |                     |                     |                     |                     |
| -1      | -1      | 11%                                                                                   | 0.12                | 0                   | 0.01                | 0.13                                             | 6%                                  | 0.51                | 0.49                | 0.49                | 0.53                |
|         | 0       | 16%                                                                                   | 0.09                | -0.04               | -0.02               | 0.09                                             | 5%                                  | 0.51                | 0.51                | 0.5                 | 0.49                |
|         | 1       | 4%                                                                                    | 0.36                | 0.4                 | 0.38                | 0.39                                             | 3%                                  | 0.49                | 0.48                | 0.53                | 0.5                 |
| -0.5    | -1      | 9%                                                                                    | 0.27                | 0.21                | 0.22                | 0.27                                             | 4%                                  | 0.47                | 0.51                | 0.51                | 0.5                 |
|         | 0       | 7%                                                                                    | 0.31                | 0.23                | 0.26                | 0.32                                             | 5%                                  | 0.5                 | 0.49                | 0.5                 | 0.52                |
|         | 1       | 4%                                                                                    | 0.59                | 0.63                | 0.61                | 0.62                                             | 2%                                  | 0.48                | 0.48                | 0.47                | 0.49                |
| 0       | -1      | 7%                                                                                    | 0.5                 | 0.49                | 0.49                | 0.5                                              | 10%                                 | 0.49                | 0.49                | 0.51                | 0.5                 |
|         | 0       | 6%                                                                                    | 0.48                | 0.52                | 0.53                | 0.51                                             | 6%                                  | 0.47                | 0.52                | 0.52                | 0.51                |
|         | 1       | 4%                                                                                    | 0.48                | 0.53                | 0.5                 | 0.5                                              | 3%                                  | 0.48                | 0.54                | 0.49                | 0.51                |
| 0.5     | -1      | 4%                                                                                    | 0.61                | 0.65                | 0.65                | 0.63                                             | 7%                                  | 0.5                 | 0.48                | 0.52                | 0.5                 |
|         | 0       | 7%                                                                                    | 0.31                | 0.29                | 0.23                | 0.29                                             | 4%                                  | 0.51                | 0.52                | 0.48                | 0.48                |
|         | 1       | 6%                                                                                    | 0.27                | 0.21                | 0.21                | 0.28                                             | 5%                                  | 0.48                | 0.51                | 0.5                 | 0.49                |
| 1       | -1      | 5%                                                                                    | 0.4                 | 0.37                | 0.37                | 0.39                                             | 7%                                  | 0.5                 | 0.49                | 0.49                | 0.49                |
|         | 0       | 10%                                                                                   | 0.08                | -0.04               | -0.03               | 0.06                                             | 6%                                  | 0.49                | 0.49                | 0.49                | 0.5                 |
|         | 1       | 13%                                                                                   | 0.12                | 0                   | 0.01                | 0.11                                             | 4%                                  | 0.52                | 0.5                 | 0.51                | 0.49                |

Proportion homogeneity rejected represents the proportion of simulated datasets where the null hypothesis of homogeneity is rejected

Supplementary Table 7. Scenario A3, results for negative, and mixed confounding, stratification approach,  $\alpha_1=0.1$

|         |         | Negative confounding ( $\alpha_2$ and $\beta_2 = -0.8$ )    |                     |                     |                     |                     |                                                  |                     |                     |                     |                     |
|---------|---------|-------------------------------------------------------------|---------------------|---------------------|---------------------|---------------------|--------------------------------------------------|---------------------|---------------------|---------------------|---------------------|
|         |         | Stratifying on collider, C                                  |                     |                     |                     |                     | Stratifying on residual collider, C <sub>0</sub> |                     |                     |                     |                     |
| $\mu_1$ | $\mu_2$ | Proportion homogeneity rejected (%)                         | Median estimates Q1 | Median estimates Q2 | Median estimates Q3 | Median estimates Q4 | Proportion homogeneity rejected (%)              | Median estimates Q1 | Median estimates Q2 | Median estimates Q3 | Median estimates Q4 |
| -0.5    | -0.5    | 15%                                                         | 0.22                | 0.45                | 0.55                | 0.76                | 21%                                              | 0.22                | 0.45                | 0.55                | 0.76                |
|         | 0       | 19%                                                         | 0.10                | 0.23                | 0.33                | 0.61                | 29%                                              | 0.10                | 0.23                | 0.33                | 0.61                |
|         | 0.5     | 24%                                                         | -0.03               | 0.14                | 0.30                | 0.64                | 50%                                              | -0.03               | 0.14                | 0.30                | 0.64                |
| 0       | -0.5    | 17%                                                         | 0.31                | 0.53                | 0.68                | 0.87                | 16%                                              | 0.31                | 0.53                | 0.68                | 0.87                |
|         | 0       | 14%                                                         | 0.34                | 0.54                | 0.61                | 0.88                | 13%                                              | 0.34                | 0.54                | 0.61                | 0.88                |
|         | 0.5     | 15%                                                         | 0.28                | 0.54                | 0.66                | 0.93                | 15%                                              | 0.28                | 0.54                | 0.66                | 0.93                |
| 0.5     | -0.5    | 23%                                                         | 0.10                | 0.23                | 0.36                | 0.72                | 42%                                              | 0.10                | 0.23                | 0.36                | 0.72                |
|         | 0       | 13%                                                         | 0.18                | 0.27                | 0.43                | 0.69                | 29%                                              | 0.18                | 0.27                | 0.43                | 0.69                |
|         | 0.5     | 14%                                                         | 0.32                | 0.47                | 0.66                | 0.89                | 22%                                              | 0.32                | 0.47                | 0.66                | 0.89                |
|         |         | Mixed confounding ( $\alpha_2 = 0.8$ and $\beta_2 = -0.8$ ) |                     |                     |                     |                     |                                                  |                     |                     |                     |                     |
| -0.5    | -0.5    | 32%                                                         | 0.22                | 0.45                | 0.55                | 0.76                | 63%                                              | 0.02                | 0.40                | 0.60                | 1.01                |
|         | 0       | 18%                                                         | 0.10                | 0.23                | 0.33                | 0.61                | 43%                                              | 0.14                | 0.40                | 0.62                | 0.89                |
|         | 0.5     | 23%                                                         | -0.03               | 0.14                | 0.30                | 0.64                | 35%                                              | 0.15                | 0.42                | 0.61                | 0.84                |
| 0       | -0.5    | 27%                                                         | 0.31                | 0.53                | 0.68                | 0.87                | 27%                                              | 0.29                | 0.55                | 0.67                | 0.90                |
|         | 0       | 23%                                                         | 0.34                | 0.54                | 0.61                | 0.88                | 24%                                              | 0.35                | 0.54                | 0.67                | 0.89                |
|         | 0.5     | 27%                                                         | 0.28                | 0.54                | 0.66                | 0.93                | 27%                                              | 0.34                | 0.53                | 0.68                | 0.91                |
| 0.5     | -0.5    | 35%                                                         | 0.10                | 0.23                | 0.36                | 0.72                | 36%                                              | 0.38                | 0.62                | 0.79                | 1.03                |
|         | 0       | 20%                                                         | 0.18                | 0.27                | 0.43                | 0.69                | 43%                                              | 0.30                | 0.60                | 0.80                | 1.10                |
|         | 0.5     | 26%                                                         | 0.32                | 0.47                | 0.66                | 0.89                | 56%                                              | 0.25                | 0.56                | 0.81                | 1.17                |

Proportion homogeneity rejected represents the proportion of simulated datasets where the null hypothesis of homogeneity is rejected



**Supplementary Table 8.** Scenario A3, results for positive, negative, and mixed confounding, stratification approach,  $\alpha_1=0.3$

|                                                                                        |         | Positive confounding ( $\alpha_2$ and $\beta_2 = 0.8$ ) |                     |                     |                     |                     |                                                  |                     |                     |                     |                     |
|----------------------------------------------------------------------------------------|---------|---------------------------------------------------------|---------------------|---------------------|---------------------|---------------------|--------------------------------------------------|---------------------|---------------------|---------------------|---------------------|
|                                                                                        |         | Stratifying on collider, C                              |                     |                     |                     |                     | Stratifying on residual collider, C <sub>0</sub> |                     |                     |                     |                     |
| $\mu_1$                                                                                | $\mu_2$ | Proportion homogeneity rejected (%)                     | Median estimates Q1 | Median estimates Q2 | Median estimates Q3 | Median estimates Q4 | Proportion homogeneity rejected (%)              | Median estimates Q1 | Median estimates Q2 | Median estimates Q3 | Median estimates Q4 |
| -0.5                                                                                   | -0.5    | 98%                                                     | -0.04               | 0.15                | 0.29                | 0.61                | 100%                                             | 0.04                | 0.37                | 0.62                | 0.99                |
|                                                                                        | 0       | 88%                                                     | 0.06                | 0.22                | 0.34                | 0.61                | 100%                                             | 0.10                | 0.40                | 0.61                | 0.88                |
|                                                                                        | 0.5     | 81%                                                     | 0.24                | 0.42                | 0.55                | 0.76                | 96%                                              | 0.18                | 0.42                | 0.58                | 0.84                |
| 0                                                                                      | -0.5    | 88%                                                     | 0.31                | 0.54                | 0.67                | 0.88                | 88%                                              | 0.31                | 0.54                | 0.67                | 0.88                |
|                                                                                        | 0       | 76%                                                     | 0.35                | 0.55                | 0.65                | 0.85                | 76%                                              | 0.34                | 0.55                | 0.66                | 0.85                |
|                                                                                        | 0.5     | 90%                                                     | 0.31                | 0.53                | 0.67                | 0.88                | 89%                                              | 0.31                | 0.53                | 0.68                | 0.88                |
| 0.5                                                                                    | -0.5    | 75%                                                     | 0.34                | 0.52                | 0.64                | 0.87                | 93%                                              | 0.37                | 0.61                | 0.78                | 1.03                |
|                                                                                        | 0       | 82%                                                     | 0.17                | 0.30                | 0.43                | 0.70                | 99%                                              | 0.31                | 0.60                | 0.80                | 1.10                |
|                                                                                        | 0.5     | 98%                                                     | 0.07                | 0.23                | 0.37                | 0.70                | 100%                                             | 0.23                | 0.58                | 0.82                | 1.17                |
| <b>Negative confounding (<math>\alpha_2</math> and <math>\beta_2 = -0.8</math>)</b>    |         |                                                         |                     |                     |                     |                     |                                                  |                     |                     |                     |                     |
| -0.5                                                                                   | -0.5    | 85%                                                     | 0.23                | 0.43                | 0.55                | 0.79                | 97%                                              | 0.16                | 0.42                | 0.59                | 0.84                |
|                                                                                        | 0       | 86%                                                     | 0.06                | 0.23                | 0.33                | 0.60                | 100%                                             | 0.11                | 0.40                | 0.59                | 0.88                |
|                                                                                        | 0.5     | 98%                                                     | -0.04               | 0.15                | 0.29                | 0.60                | 100%                                             | 0.02                | 0.38                | 0.62                | 0.97                |
| 0                                                                                      | -0.5    | 88%                                                     | 0.31                | 0.53                | 0.66                | 0.88                | 88%                                              | 0.31                | 0.53                | 0.66                | 0.88                |
|                                                                                        | 0       | 76%                                                     | 0.35                | 0.53                | 0.67                | 0.85                | 77%                                              | 0.35                | 0.53                | 0.66                | 0.85                |
|                                                                                        | 0.5     | 89%                                                     | 0.31                | 0.52                | 0.67                | 0.89                | 88%                                              | 0.31                | 0.53                | 0.67                | 0.89                |
| 0.5                                                                                    | -0.5    | 97%                                                     | 0.06                | 0.24                | 0.36                | 0.70                | 100%                                             | 0.23                | 0.58                | 0.82                | 1.16                |
|                                                                                        | 0       | 83%                                                     | 0.16                | 0.30                | 0.42                | 0.71                | 99%                                              | 0.31                | 0.59                | 0.80                | 1.09                |
|                                                                                        | 0.5     | 77%                                                     | 0.34                | 0.51                | 0.65                | 0.88                | 93%                                              | 0.37                | 0.61                | 0.79                | 1.03                |
| <b>Mixed confounding (<math>\alpha_2 = 0.8</math> and <math>\beta_2 = -0.8</math>)</b> |         |                                                         |                     |                     |                     |                     |                                                  |                     |                     |                     |                     |
| -0.5                                                                                   | -0.5    | 100%                                                    | 0.23                | 0.50                | 0.63                | 0.87                | 100%                                             | 0.04                | 0.38                | 0.62                | 0.97                |
|                                                                                        | 0       | 99%                                                     | 0.23                | 0.45                | 0.55                | 0.78                | 100%                                             | 0.10                | 0.40                | 0.60                | 0.89                |
|                                                                                        | 0.5     | 99%                                                     | 0.18                | 0.37                | 0.50                | 0.72                | 100%                                             | 0.17                | 0.42                | 0.59                | 0.84                |
| 0                                                                                      | -0.5    | 100%                                                    | 0.31                | 0.52                | 0.67                | 0.89                | 100%                                             | 0.31                | 0.52                | 0.66                | 0.89                |
|                                                                                        | 0       | 98%                                                     | 0.35                | 0.53                | 0.66                | 0.86                | 98%                                              | 0.35                | 0.53                | 0.66                | 0.86                |
|                                                                                        | 0.5     | 99%                                                     | 0.31                | 0.53                | 0.68                | 0.88                | 99%                                              | 0.31                | 0.53                | 0.68                | 0.88                |
| 0.5                                                                                    | -0.5    | 98%                                                     | 0.30                | 0.46                | 0.58                | 0.83                | 100%                                             | 0.38                | 0.62                | 0.78                | 1.04                |
|                                                                                        | 0       | 98%                                                     | 0.33                | 0.52                | 0.64                | 0.88                | 100%                                             | 0.31                | 0.60                | 0.80                | 1.09                |
|                                                                                        | 0.5     | 100%                                                    | 0.32                | 0.56                | 0.71                | 0.97                | 100%                                             | 0.23                | 0.58                | 0.82                | 1.17                |

Proportion homogeneity rejected represents the proportion of simulated datasets where the null hypothesis of homogeneity is rejected

Supplementary Table 9. Scenario A3, results for positive, negative, and mixed confounding, stratification approach,  $\alpha_1=0.05$

|                                                                                        |         | Positive confounding ( $\alpha_2$ and $\beta_2 = 0.8$ ) |                     |                     |                     |                     |                                                  |                     |                     |                     |                     |
|----------------------------------------------------------------------------------------|---------|---------------------------------------------------------|---------------------|---------------------|---------------------|---------------------|--------------------------------------------------|---------------------|---------------------|---------------------|---------------------|
|                                                                                        |         | Stratifying on collider, C                              |                     |                     |                     |                     | Stratifying on residual collider, C <sub>0</sub> |                     |                     |                     |                     |
| $\mu_1$                                                                                | $\mu_2$ | Proportion homogeneity rejected (%)                     | Median estimates Q1 | Median estimates Q2 | Median estimates Q3 | Median estimates Q4 | Proportion homogeneity rejected (%)              | Median estimates Q1 | Median estimates Q2 | Median estimates Q3 | Median estimates Q4 |
| -0.5                                                                                   | -0.5    | 10%                                                     | -0.02               | 0.14                | 0.32                | 0.63                | 17%                                              | 0.05                | 0.35                | 0.66                | 0.99                |
|                                                                                        | 0       | 8%                                                      | 0.11                | 0.22                | 0.31                | 0.53                | 9%                                               | 0.14                | 0.38                | 0.60                | 0.85                |
|                                                                                        | 0.5     | 8%                                                      | 0.22                | 0.44                | 0.58                | 0.77                | 9%                                               | 0.17                | 0.41                | 0.61                | 0.86                |
| 0                                                                                      | -0.5    | 8%                                                      | 0.33                | 0.57                | 0.66                | 0.79                | 8%                                               | 0.33                | 0.55                | 0.66                | 0.81                |
|                                                                                        | 0       | 6%                                                      | 0.27                | 0.48                | 0.65                | 0.84                | 6%                                               | 0.27                | 0.51                | 0.64                | 0.86                |
|                                                                                        | 0.5     | 7%                                                      | 0.32                | 0.50                | 0.73                | 0.93                | 8%                                               | 0.33                | 0.51                | 0.75                | 0.93                |
| 0.5                                                                                    | -0.5    | 4%                                                      | 0.37                | 0.48                | 0.66                | 0.89                | 7%                                               | 0.41                | 0.61                | 0.85                | 1.03                |
|                                                                                        | 0       | 6%                                                      | 0.15                | 0.34                | 0.41                | 0.68                | 9%                                               | 0.27                | 0.60                | 0.79                | 1.05                |
|                                                                                        | 0.5     | 8%                                                      | 0.03                | 0.26                | 0.41                | 0.71                | 16%                                              | 0.18                | 0.60                | 0.84                | 1.19                |
| <b>Negative confounding (<math>\alpha_2</math> and <math>\beta_2 = -0.8</math>)</b>    |         |                                                         |                     |                     |                     |                     |                                                  |                     |                     |                     |                     |
| -0.5                                                                                   | -0.5    | 8%                                                      | 0.20                | 0.39                | 0.57                | 0.78                | 11%                                              | 0.14                | 0.38                | 0.61                | 0.88                |
|                                                                                        | 0       | 7%                                                      | 0.10                | 0.17                | 0.37                | 0.56                | 10%                                              | 0.13                | 0.33                | 0.61                | 0.85                |
|                                                                                        | 0.5     | 7%                                                      | 0.01                | 0.14                | 0.27                | 0.60                | 14%                                              | 0.07                | 0.37                | 0.61                | 0.95                |
| 0                                                                                      | -0.5    | 6%                                                      | 0.28                | 0.55                | 0.67                | 0.89                | 8%                                               | 0.26                | 0.56                | 0.69                | 0.88                |
|                                                                                        | 0       | 7%                                                      | 0.33                | 0.55                | 0.66                | 0.87                | 6%                                               | 0.35                | 0.55                | 0.65                | 0.90                |
|                                                                                        | 0.5     | 5%                                                      | 0.27                | 0.56                | 0.68                | 0.87                | 5%                                               | 0.26                | 0.51                | 0.70                | 0.87                |
| 0.5                                                                                    | -0.5    | 8%                                                      | 0.08                | 0.22                | 0.37                | 0.74                | 14%                                              | 0.26                | 0.55                | 0.80                | 1.19                |
|                                                                                        | 0       | 8%                                                      | 0.16                | 0.29                | 0.45                | 0.67                | 10%                                              | 0.31                | 0.61                | 0.81                | 1.07                |
|                                                                                        | 0.5     | 6%                                                      | 0.37                | 0.55                | 0.69                | 0.91                | 5%                                               | 0.40                | 0.66                | 0.82                | 1.08                |
| <b>Mixed confounding (<math>\alpha_2 = 0.8</math> and <math>\beta_2 = -0.8</math>)</b> |         |                                                         |                     |                     |                     |                     |                                                  |                     |                     |                     |                     |
| -0.5                                                                                   | -0.5    | 10%                                                     | 0.25                | 0.50                | 0.64                | 0.87                | 20%                                              | 0.07                | 0.36                | 0.62                | 0.95                |
|                                                                                        | 0       | 7%                                                      | 0.30                | 0.46                | 0.53                | 0.78                | 10%                                              | 0.16                | 0.42                | 0.58                | 0.91                |
|                                                                                        | 0.5     | 8%                                                      | 0.18                | 0.35                | 0.53                | 0.73                | 13%                                              | 0.15                | 0.43                | 0.63                | 0.84                |
| 0                                                                                      | -0.5    | 7%                                                      | 0.35                | 0.54                | 0.68                | 0.86                | 8%                                               | 0.35                | 0.54                | 0.67                | 0.88                |
|                                                                                        | 0       | 7%                                                      | 0.33                | 0.52                | 0.63                | 0.89                | 8%                                               | 0.34                | 0.53                | 0.63                | 0.90                |
|                                                                                        | 0.5     | 9%                                                      | 0.31                | 0.57                | 0.66                | 0.88                | 9%                                               | 0.30                | 0.58                | 0.65                | 0.88                |
| 0.5                                                                                    | -0.5    | 8%                                                      | 0.29                | 0.42                | 0.54                | 0.77                | 9%                                               | 0.39                | 0.58                | 0.74                | 0.99                |
|                                                                                        | 0       | 9%                                                      | 0.31                | 0.47                | 0.61                | 0.87                | 14%                                              | 0.26                | 0.55                | 0.78                | 1.09                |
|                                                                                        | 0.5     | 11%                                                     | 0.31                | 0.55                | 0.75                | 0.99                | 20%                                              | 0.20                | 0.55                | 0.85                | 1.19                |

Proportion homogeneity rejected represents the proportion of simulated datasets where the null hypothesis of homogeneity is rejected

**Supplementary Table 10.** Scenario B1, results for positive confounding, adjustment approach,  $\alpha_1=0.1$ , considering C as a function of both risk factor and outcome

|         |         | Positive confounding ( $\alpha_2$ and $\beta_2= 0.8$ ) |                       |                                |                       |
|---------|---------|--------------------------------------------------------|-----------------------|--------------------------------|-----------------------|
|         |         | Median estimate                                        | Type I error rate (%) | Median estimate                | Type I error rate (%) |
| $\mu_1$ | $\mu_3$ | <i>No adjust for collider</i>                          |                       | <i>Adjust Y/G for collider</i> |                       |
| -0.5    | -0.5    | -0.01                                                  | 4%                    | -0.27                          | 65%                   |
|         | 0       | 0.00                                                   | 7%                    | -0.03                          | 7%                    |
|         | 0.5     | -0.01                                                  | 5%                    | 0.23                           | 52%                   |
| 0       | -0.5    | 0.01                                                   | 6%                    | 0.00                           | 5%                    |
|         | 0       | 0.00                                                   | 6%                    | 0.00                           | 6%                    |
|         | 0.5     | 0.00                                                   | 5%                    | 0.01                           | 7%                    |
| 0.5     | -0.5    | -0.01                                                  | 6%                    | 0.08                           | 8%                    |
|         | 0       | -0.01                                                  | 3%                    | -0.17                          | 28%                   |
|         | 0.5     | 0.02                                                   | 5%                    | -0.25                          | 74%                   |

Empirical Type I error rate represents the proportion of simulated datasets where the null hypothesis is not rejected

**Supplementary Table 11.** Scenario B2 and B3, results for positive confounding, stratification approach,  $\alpha_1=0.1$ , considering C as a function of both risk factor and outcome, when the causal effect is constant (Scenario B2) and it when depends on U (Scenario B3)

|         |         | Scenario B2                         |                     |                     |                     |                     | Positive confounding ( $\alpha_2$ and $\beta_2= 0.8$ ), where $\beta_1=0.5$      |                     |                     |                     |                     |
|---------|---------|-------------------------------------|---------------------|---------------------|---------------------|---------------------|----------------------------------------------------------------------------------|---------------------|---------------------|---------------------|---------------------|
|         |         | Stratifying on collider, C          |                     |                     |                     |                     | Stratifying on residual collider, C <sub>0</sub>                                 |                     |                     |                     |                     |
| $\mu_1$ | $\mu_3$ | Proportion homogeneity rejected (%) | Median estimates Q1 | Median estimates Q2 | Median estimates Q3 | Median estimates Q4 | Proportion homogeneity rejected (%)                                              | Median estimates Q1 | Median estimates Q2 | Median estimates Q3 | Median estimates Q4 |
| -0.5    | -0.5    | 8%                                  | 0.07                | -0.05               | -0.03               | 0.06                | 6%                                                                               | 0.49                | 0.49                | 0.50                | 0.51                |
|         | 0       | 5%                                  | 0.39                | 0.37                | 0.37                | 0.37                | 5%                                                                               | 0.51                | 0.49                | 0.52                | 0.51                |
|         | 0.5     | 5%                                  | 0.60                | 0.66                | 0.65                | 0.61                | 5%                                                                               | 0.47                | 0.52                | 0.49                | 0.49                |
| 0       | -0.5    | 6%                                  | 0.36                | 0.32                | 0.35                | 0.34                | 6%                                                                               | 0.50                | 0.51                | 0.51                | 0.49                |
|         | 0       | 7%                                  | 0.48                | 0.50                | 0.52                | 0.48                | 6%                                                                               | 0.49                | 0.52                | 0.51                | 0.48                |
|         | 0.5     | 5%                                  | 0.35                | 0.31                | 0.32                | 0.36                | 5%                                                                               | 0.50                | 0.50                | 0.51                | 0.50                |
| 0.5     | -0.5    | 5%                                  | 0.54                | 0.54                | 0.58                | 0.54                | 5%                                                                               | 0.49                | 0.49                | 0.53                | 0.50                |
|         | 0       | 6%                                  | 0.24                | 0.21                | 0.20                | 0.28                | 5%                                                                               | 0.48                | 0.52                | 0.49                | 0.52                |
|         | 0.5     | 6%                                  | 0.10                | 0.01                | 0.02                | 0.10                | 5%                                                                               | 0.48                | 0.51                | 0.51                | 0.50                |
|         |         | Scenario B3                         |                     |                     |                     |                     | Positive confounding ( $\alpha_2$ and $\beta_2= 0.8$ ), where $\beta_1=0.5+0.2U$ |                     |                     |                     |                     |
| $\mu_1$ | $\mu_3$ | Proportion homogeneity rejected (%) | Median estimates Q1 | Median estimates Q2 | Median estimates Q3 | Median estimates Q4 | Proportion homogeneity rejected (%)                                              | Median estimates Q1 | Median estimates Q2 | Median estimates Q3 | Median estimates Q4 |
| -0.5    | -0.5    | 6%                                  | 0.09                | -0.07               | -0.07               | 0.00                | 9%                                                                               | 0.65                | 0.52                | 0.45                | 0.35                |
|         | 0       | 7%                                  | 0.40                | 0.35                | 0.38                | 0.38                | 7%                                                                               | 0.52                | 0.50                | 0.51                | 0.48                |
|         | 0.5     | 12%                                 | 0.45                | 0.59                | 0.69                | 0.85                | 11%                                                                              | 0.32                | 0.45                | 0.52                | 0.71                |
| 0       | -0.5    | 7%                                  | 0.50                | 0.32                | 0.27                | 0.24                | 8%                                                                               | 0.69                | 0.50                | 0.43                | 0.36                |
|         | 0       | 5%                                  | 0.43                | 0.46                | 0.51                | 0.57                | 4%                                                                               | 0.42                | 0.48                | 0.50                | 0.56                |
|         | 0.5     | 9%                                  | 0.20                | 0.28                | 0.32                | 0.51                | 13%                                                                              | 0.34                | 0.47                | 0.53                | 0.70                |
| 0.5     | -0.5    | 7%                                  | 0.66                | 0.58                | 0.58                | 0.41                | 7%                                                                               | 0.63                | 0.52                | 0.48                | 0.36                |
|         | 0       | 5%                                  | 0.17                | 0.19                | 0.21                | 0.34                | 6%                                                                               | 0.36                | 0.49                | 0.55                | 0.64                |
|         | 0.5     | 8%                                  | -0.01               | -0.03               | -0.02               | 0.16                | 13%                                                                              | 0.31                | 0.46                | 0.53                | 0.69                |

Proportion homogeneity rejected represents the proportion of simulated datasets where the null hypothesis of homogeneity is rejected

Supplementary Table 12. Scenario C1, results for positive confounding, adjustment approach,  $\alpha_1=0.1$ , considering a binary outcome Y

|         |         | Positive confounding ( $\alpha_2$ and $\beta_2= 0.8$ ) |    |                                |     |
|---------|---------|--------------------------------------------------------|----|--------------------------------|-----|
|         |         | Median estimate                                        |    | Type I error rate (%)          |     |
| $\mu_1$ | $\mu_2$ | <i>No adjust for collider</i>                          |    | <i>Adjust Y/G for collider</i> |     |
| -0.5    | -0.5    | 0.02                                                   | 6% | -0.14                          | 13% |
|         | 0       | -0.01                                                  | 5% | -0.11                          | 8%  |
|         | 0.5     | -0.01                                                  | 4% | 0.02                           | 5%  |
| 0       | -0.5    | -0.01                                                  | 4% | -0.01                          | 4%  |
|         | 0       | -0.01                                                  | 4% | -0.01                          | 4%  |
|         | 0.5     | 0.00                                                   | 5% | 0.00                           | 5%  |
| 0.5     | -0.5    | 0.00                                                   | 4% | 0.02                           | 6%  |
|         | 0       | 0.02                                                   | 5% | -0.09                          | 7%  |
|         | 0.5     | -0.01                                                  | 6% | -0.18                          | 14% |

Empirical Type I error rate represents the proportion of simulated datasets where the null hypothesis is not rejected

**Supplementary Table 13.** Scenario C2 and C3, results for positive confounding, stratification approach,  $\alpha_1=0.1$ , considering a binary outcome Y, when the causal effect is constant (Scenario C2) and it when depends on C (Scenario C3)

|         |         | Scenario C2 Positive confounding ( $\alpha_2$ and $\beta_2=0.8$ ), where $\beta_1=0.5$      |                     |                     |                     |                                                  |                                     |                     |                     |                     |                     |
|---------|---------|---------------------------------------------------------------------------------------------|---------------------|---------------------|---------------------|--------------------------------------------------|-------------------------------------|---------------------|---------------------|---------------------|---------------------|
|         |         | Stratifying on collider, C                                                                  |                     |                     |                     | Stratifying on residual collider, C <sub>0</sub> |                                     |                     |                     |                     |                     |
| $\mu_1$ | $\mu_2$ | Proportion homogeneity rejected (%)                                                         | Median estimates Q1 | Median estimates Q2 | Median estimates Q3 | Median estimates Q4                              | Proportion homogeneity rejected (%) | Median estimates Q1 | Median estimates Q2 | Median estimates Q3 | Median estimates Q4 |
| -0.5    | -0.5    | 8%                                                                                          | 0.17                | 0.16                | 0.15                | 0.22                                             | 6%                                  | 0.43                | 0.42                | 0.39                | 0.41                |
|         | 0       | 6%                                                                                          | 0.21                | 0.19                | 0.18                | 0.22                                             | 7%                                  | 0.37                | 0.38                | 0.40                | 0.36                |
|         | 0.5     | 5%                                                                                          | 0.39                | 0.37                | 0.38                | 0.36                                             | 4%                                  | 0.42                | 0.40                | 0.39                | 0.38                |
| 0       | -0.5    | 4%                                                                                          | 0.44                | 0.41                | 0.37                | 0.37                                             | 4%                                  | 0.43                | 0.39                | 0.37                | 0.37                |
|         | 0       | 3%                                                                                          | 0.41                | 0.42                | 0.41                | 0.38                                             | 4%                                  | 0.41                | 0.39                | 0.39                | 0.36                |
|         | 0.5     | 5%                                                                                          | 0.38                | 0.41                | 0.39                | 0.40                                             | 4%                                  | 0.40                | 0.41                | 0.39                | 0.40                |
| 0.5     | -0.5    | 8%                                                                                          | 0.28                | 0.29                | 0.36                | 0.38                                             | 7%                                  | 0.32                | 0.35                | 0.37                | 0.41                |
|         | 0       | 6%                                                                                          | 0.23                | 0.20                | 0.19                | 0.23                                             | 5%                                  | 0.38                | 0.38                | 0.42                | 0.39                |
|         | 0.5     | 5%                                                                                          | 0.27                | 0.16                | 0.13                | 0.23                                             | 5%                                  | 0.50                | 0.44                | 0.41                | 0.46                |
|         |         | Scenario C3 Positive confounding ( $\alpha_2$ and $\beta_2=0.8$ ), where $\beta_1=0.5+0.2C$ |                     |                     |                     |                                                  |                                     |                     |                     |                     |                     |
| $\mu_1$ | $\mu_2$ | Proportion homogeneity rejected (%)                                                         | Median estimates Q1 | Median estimates Q2 | Median estimates Q3 | Median estimates Q4                              | Proportion homogeneity rejected (%) | Median estimates Q1 | Median estimates Q2 | Median estimates Q3 | Median estimates Q4 |
| -0.5    | -0.5    | 7%                                                                                          | -0.07               | 0.14                | 0.30                | 0.44                                             | 13%                                 | 0.01                | 0.37                | 0.57                | 0.70                |
|         | 0       | 7%                                                                                          | 0.04                | 0.18                | 0.26                | 0.44                                             | 10%                                 | 0.09                | 0.34                | 0.49                | 0.61                |
|         | 0.5     | 6%                                                                                          | 0.24                | 0.39                | 0.41                | 0.49                                             | 8%                                  | 0.19                | 0.37                | 0.47                | 0.54                |
| 0       | -0.5    | 5%                                                                                          | 0.27                | 0.38                | 0.49                | 0.62                                             | 5%                                  | 0.26                | 0.39                | 0.49                | 0.60                |
|         | 0       | 6%                                                                                          | 0.28                | 0.40                | 0.48                | 0.58                                             | 8%                                  | 0.27                | 0.40                | 0.49                | 0.58                |
|         | 0.5     | 6%                                                                                          | 0.31                | 0.39                | 0.52                | 0.61                                             | 6%                                  | 0.29                | 0.40                | 0.53                | 0.62                |
| 0.5     | -0.5    | 7%                                                                                          | 0.22                | 0.40                | 0.50                | 0.60                                             | 10%                                 | 0.23                | 0.43                | 0.58                | 0.66                |
|         | 0       | 5%                                                                                          | 0.14                | 0.23                | 0.33                | 0.50                                             | 7%                                  | 0.26                | 0.41                | 0.59                | 0.73                |
|         | 0.5     | 6%                                                                                          | 0.06                | 0.21                | 0.27                | 0.42                                             | 11%                                 | 0.22                | 0.50                | 0.62                | 0.78                |

Proportion homogeneity rejected represents the proportion of simulated datasets where the null hypothesis of homogeneity is rejected
